# Supplementary material for: Traditional and Domestic Cooking Dramatically Reduce Estrogenic Isoflavones in Soy Foods
Source: MDPI journal article supplement (doi:10.3390/foods13070999), 2024-03-25
Supplement: s1 [file s1]

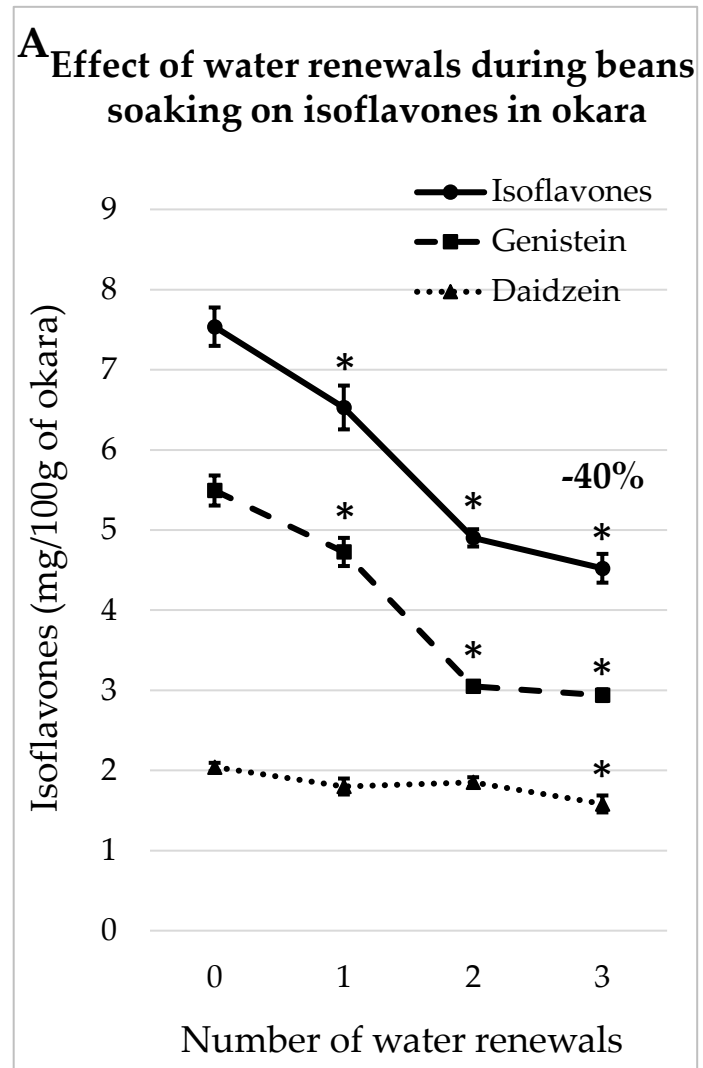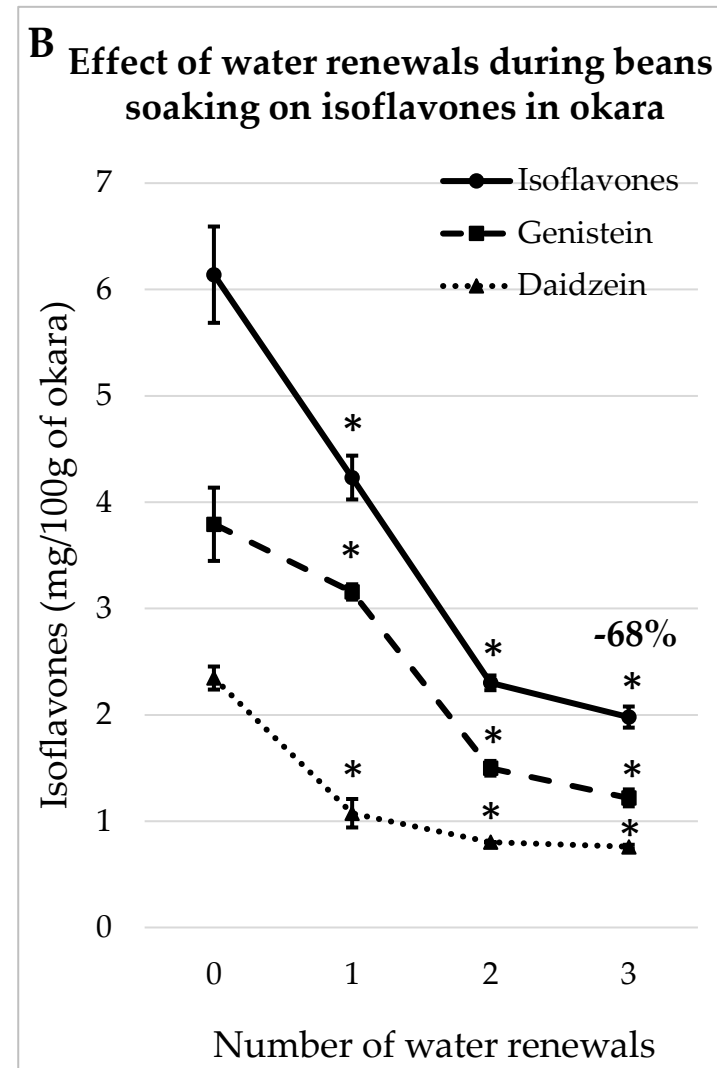

**Supplementary figure S1.** Effect of water renewals during beans soaking on the level of isoflavones in Okara. **A.** Okara made from entire beans. **B.** Okara made from dehulled beans. The stars indicate a significant difference with 0 renewal ( $p < 0,05$ )
